# Supplementary material for: High temperature continuous flow synthesis of CdSe/CdS/ZnS, CdS/ZnS, and CdSeS/ZnS nanocrystals
Source: Royal Society of Chemistry journal article supplement (doi:10.1039/c5nr04510j), 2015-01-01
Supplement: c5nr04510j1.pdf [file c5nr04510j1.pdf]

## High temperature continuous flow synthesis of CdSe/CdS/ZnS, CdS/ZnS, and CdSeS/ZnS nanocrystals

Matt S. Naughton<sup>a†</sup>, Vivek Kumar<sup>a</sup>, Yolanda Bonita<sup>a</sup>, Kishori Deshpande<sup>b</sup>, and Paul J.A. Kenis<sup>a\*</sup>

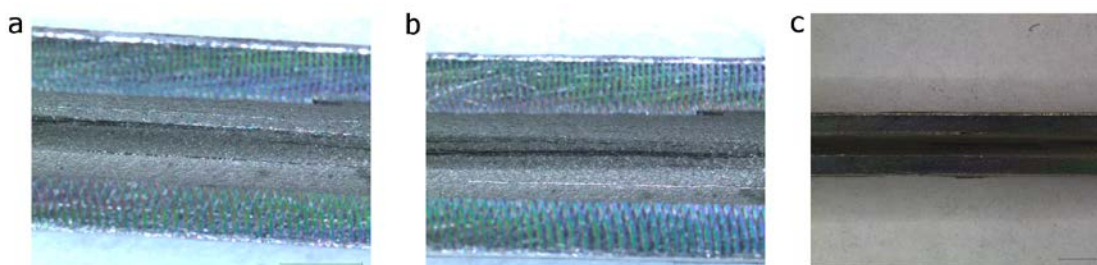

Fig1. (a), (b) show the images of a single “cut-open” section of the reactor at two different positions. The scale bar represents a length of 1 mm. (c) shows another “cut-open” section of the reactor different from (a) and (b). The scale bar represents a length of 2 mm. All the above images show no signs of deposition of quantum dots on the inner walls of the reactor.
